# Supplementary material for: HIC1 controls cellular- and HIV-1- gene transcription via interactions with CTIP2 and HMGA1
Source: PubMed Central journal article supplement (PMC5057145; doi:10.1038/srep34920), 2016-10-11
Supplement: srep34920-s1.pdf [file srep34920-s1.pdf]

**Table 1: Gene lists of cellular targets regulated by HIC1 and CTIP2**

**HIC1 controls cellular- and HIV-1- gene transcription via interactions with CTIP2 and HMGA1**

Valentin Le Douce<sup>1,2,4</sup>, Faezeh Forouzanfar<sup>1</sup>, Sebastian Eilebrecht<sup>8,9</sup>, Benoit Van Driessche<sup>7</sup>, Amina Ait-Ammar<sup>1</sup>, Roxane Verdikt<sup>7</sup>, Yoshihito Kurashige<sup>5</sup>, Céline Marban<sup>5</sup>, Ermanno Candolfi<sup>1</sup>, Virginie Gautier<sup>4</sup>, Arndt G. Benecke<sup>6,9</sup>, Carine Van Lint<sup>7#</sup>, Olivier Rohr<sup>1,2,3#</sup> and Christian Schwartz<sup>1,2#</sup>

| PROBE        | Entrez_Gene_ID | Symbol   | Definition                                                                                                                     |
|--------------|----------------|----------|--------------------------------------------------------------------------------------------------------------------------------|
| ILMN_1653115 | 1891           | ECH1     | Homo sapiens enoyl Coenzyme A hydratase 1, peroxisomal (ECH1), mRNA.                                                           |
| ILMN_1791447 | 6387           | CXCL12   | Homo sapiens chemokine (C-X-C motif) ligand 12 (stromal cell-derived factor 1) (CXCL12), transcript variant 1, mRNA.           |
| ILMN_1723123 | 2261           | FGFR3    | Homo sapiens fibroblast growth factor receptor 3 (achondroplasia, thanatophoric dwarfism) (FGFR3), transcript variant 2, mRNA. |
| ILMN_1796074 | 494514         | C18orf56 | Homo sapiens chromosome 18 open reading frame 56 (C18orf56), mRNA.                                                             |
| ILMN_1784602 | 1026           | CDKN1A   | Homo sapiens cyclin-dependent kinase inhibitor 1A (p21, Cip1) (CDKN1A), transcript variant 1, mRNA.                            |
| ILMN_1760593 | 1407           | CRY1     | Homo sapiens cryptochrome 1 (photolyase-like) (CRY1), mRNA.                                                                    |
| ILMN_1811997 | 27246          | ZNF364   | Homo sapiens zinc finger protein 364 (ZNF364), mRNA.                                                                           |
| ILMN_1743104 | 83759          | RBM4B    | Homo sapiens RNA binding motif protein 4B (RBM4B), mRNA.                                                                       |
| ILMN_1712636 | 4931           | NVL      | Homo sapiens nuclear VCP-like (NVL), transcript variant 2, mRNA.                                                               |
| ILMN_1673721 | 9156           | EXO1     | Homo sapiens exonuclease 1 (EXO1), transcript variant 1, mRNA.                                                                 |
| ILMN_1813625 | 7706           | TRIM25   | Homo sapiens tripartite motif-containing 25 (TRIM25), mRNA.                                                                    |
| ILMN_1772677 | 4850           | CNOT4    | Homo sapiens CCR4-NOT transcription complex, subunit 4 (CNOT4), transcript variant 1, mRNA.                                    |
| ILMN_1687922 | 6100           | RP9      | Homo sapiens retinitis pigmentosa 9 (autosomal dominant) (RP9), mRNA.                                                          |
| ILMN_1761147 | 2553           | GABPB2   | Homo sapiens GA binding protein transcription factor, beta subunit 2 (GABPB2), transcript variant gamma-2, mRNA.               |
| ILMN_2155516 | 79691          | QTRTD1   | Homo sapiens queuine tRNA-ribosyltransferase domain containing 1 (QTRTD1), mRNA.                                               |
| ILMN_1775943 | 84312          | BRMS1L   | Homo sapiens breast cancer metastasis-suppressor 1-like (BRMS1L), mRNA.                                                        |

|              |        |           |                                                                                                                           |
|--------------|--------|-----------|---------------------------------------------------------------------------------------------------------------------------|
| ILMN_1787509 | 85441  | PRIC285   | Homo sapiens peroxisomal proliferator-activated receptor A interacting complex 285 (PRIC285), transcript variant 2, mRNA. |
| ILMN_1683950 | 29916  | SNX11     | Homo sapiens sorting nexin 11 (SNX11), transcript variant 1, mRNA.                                                        |
| ILMN_2044617 | 51001  | MTERFD1   | Homo sapiens MTERF domain containing 1 (MTERFD1), mRNA.                                                                   |
| ILMN_3298694 | 441250 | TYW1B     | PREDICTED: Homo sapiens misc_RNA (TYW1B), miscRNA.                                                                        |
| ILMN_1691156 | 4489   | MT1A      | Homo sapiens metallothionein 1A (MT1A), mRNA.                                                                             |
| ILMN_1753931 | 1036   | CDO1      | Homo sapiens cysteine dioxygenase, type I (CDO1), mRNA.                                                                   |
| ILMN_1653712 | 91373  | UAP1L1    | Homo sapiens UDP-N-acetylglucosamine pyrophosphorylase 1-like 1 (UAP1L1), mRNA.                                           |
| ILMN_2108938 | 23360  | FNBP4     | Homo sapiens formin binding protein 4 (FNBP4), mRNA.                                                                      |
| ILMN_2080611 | 23590  | PDSS1     | Homo sapiens prenyl (decaprenyl) diphosphate synthase, subunit 1 (PDSS1), mRNA.                                           |
| ILMN_2061310 | 55609  | ZNF280C   | Homo sapiens zinc finger protein 280C (ZNF280C), mRNA.                                                                    |
| ILMN_2090802 | 84283  | TMEM79    | Homo sapiens transmembrane protein 79 (TMEM79), mRNA.                                                                     |
| ILMN_1705241 | 23424  | TDRD7     | Homo sapiens tudor domain containing 7 (TDRD7), mRNA.                                                                     |
| ILMN_1663532 | 55188  | RIC8B     | Homo sapiens resistance to inhibitors of cholinesterase 8 homolog B (C. elegans) (RIC8B), mRNA.                           |
| ILMN_1795678 | 10623  | POLR3C    | Homo sapiens polymerase (RNA) III (DNA directed) polypeptide C (62kD) (POLR3C), mRNA.                                     |
| ILMN_1784584 | 60561  | RINT1     | Homo sapiens RAD50 interactor 1 (RINT1), mRNA.                                                                            |
| ILMN_1664630 | 1111   | CHEK1     | Homo sapiens CHK1 checkpoint homolog (S. pombe) (CHEK1), mRNA.                                                            |
| ILMN_1776490 | 78995  | C17orf53  | Homo sapiens chromosome 17 open reading frame 53 (C17orf53), mRNA.                                                        |
| ILMN_1685661 | 51018  | RRP15     | Homo sapiens ribosomal RNA processing 15 homolog (S. cerevisiae) (RRP15), mRNA.                                           |
| ILMN_1741054 | 8884   | SLC5A6    | Homo sapiens solute carrier family 5 (sodium-dependent vitamin transporter), member 6 (SLC5A6), mRNA.                     |
| ILMN_1773337 | 22943  | DKK1      | Homo sapiens dickkopf homolog 1 (Xenopus laevis) (DKK1), mRNA.                                                            |
| ILMN_1724145 | 8535   | CBX4      | Homo sapiens chromobox homolog 4 (Pc class homolog, Drosophila) (CBX4), mRNA.                                             |
| ILMN_1662318 | 29080  | CCDC59    | Homo sapiens coiled-coil domain containing 59 (CCDC59), mRNA.                                                             |
| ILMN_1658504 | 1119   | CHKA      | Homo sapiens choline kinase alpha (CHKA), transcript variant 2, mRNA.                                                     |
| ILMN_1698533 | 3419   | IDH3A     | Homo sapiens isocitrate dehydrogenase 3 (NAD+) alpha (IDH3A), nuclear gene encoding mitochondrial protein, mRNA.          |
| ILMN_1689652 | 55178  | RNMTL1    | Homo sapiens RNA methyltransferase like 1 (RNMTL1), mRNA.                                                                 |
| ILMN_1745807 | 80021  | TMEM62    | Homo sapiens transmembrane protein 62 (TMEM62), mRNA.                                                                     |
| ILMN_1736510 | 3344   | FOXN2     | Homo sapiens forkhead box N2 (FOXN2), mRNA.                                                                               |
| ILMN_1754272 | 64785  | GINS3     | Homo sapiens GINS complex subunit 3 (Psf3 homolog) (GINS3), mRNA.                                                         |
| ILMN_1707199 | 91833  | WDR20     | Homo sapiens WD repeat domain 20 (WDR20), transcript variant 1, mRNA.                                                     |
| ILMN_1712347 | 644422 | LOC644422 | PREDICTED: Homo sapiens misc_RNA (LOC644422), miscRNA.                                                                    |

|              |        |           |                                                                                                                                               |
|--------------|--------|-----------|-----------------------------------------------------------------------------------------------------------------------------------------------|
| ILMN_1797031 | 79663  | HSPBAP1   | Homo sapiens HSPB (heat shock 27kDa) associated protein 1 (HSPBAP1), mRNA.                                                                    |
| ILMN_1665554 | 55290  | BRF2      | Homo sapiens BRF2, subunit of RNA polymerase III transcription initiation factor, BRF1-like (BRF2), mRNA.                                     |
| ILMN_1815733 | 1983   | EIF5      | Homo sapiens eukaryotic translation initiation factor 5 (EIF5), transcript variant 1, mRNA.                                                   |
| ILMN_1681008 | 10668  | CGRRF1    | Homo sapiens cell growth regulator with ring finger domain 1 (CGRRF1), mRNA.                                                                  |
| ILMN_2115154 | 11097  | NUPL2     | Homo sapiens nucleoporin like 2 (NUPL2), mRNA.                                                                                                |
| ILMN_1721391 | 533    | ATP6V0B   | Homo sapiens ATPase, H+ transporting, lysosomal 21kDa, V0 subunit b (ATP6V0B), transcript variant 1, mRNA.                                    |
| ILMN_2187727 | 64318  | NOC3L     | Homo sapiens nucleolar complex associated 3 homolog ( <i>S. cerevisiae</i> ) (NOC3L), mRNA.                                                   |
| ILMN_1663667 | 80308  | FLAD1     | Homo sapiens FAD1 flavin adenine dinucleotide synthetase homolog ( <i>S. cerevisiae</i> ) (FLAD1), transcript variant 2, mRNA.                |
| ILMN_1652409 | 55812  | SPATA7    | Homo sapiens spermatogenesis associated 7 (SPATA7), transcript variant 2, mRNA.                                                               |
| ILMN_2279873 | 123720 | WHAMM     | Homo sapiens WAS protein homolog associated with actin, golgi membranes and microtubules (WHAMM), mRNA.                                       |
| ILMN_3305938 | 6446   | SGK1      | Homo sapiens serum/glucocorticoid regulated kinase 1 (SGK1), transcript variant 1, mRNA.                                                      |
| ILMN_1767892 | 11266  | DUSP12    | Homo sapiens dual specificity phosphatase 12 (DUSP12), mRNA.                                                                                  |
| ILMN_2067852 | 7779   | SLC30A1   | Homo sapiens solute carrier family 30 (zinc transporter), member 1 (SLC30A1), mRNA.                                                           |
| ILMN_1773868 | 8233   | U2AF1L2   | Homo sapiens U2(RNU2) small nuclear RNA auxiliary factor 1-like 2 (U2AF1L2), mRNA.                                                            |
| ILMN_1759513 | 390    | RND3      | Homo sapiens Rho family GTPase 3 (RND3), mRNA.                                                                                                |
| ILMN_1677305 | 5817   | PVR       | Homo sapiens poliovirus receptor (PVR), mRNA.                                                                                                 |
| ILMN_1781102 | 79609  | C14orf138 | Homo sapiens chromosome 14 open reading frame 138 (C14orf138), transcript variant 2, mRNA.                                                    |
| ILMN_1674243 | 7037   | TFRC      | Homo sapiens transferrin receptor (p90, CD71) (TFRC), mRNA.                                                                                   |
| ILMN_1702487 | 6446   | SGK       | Homo sapiens serum/glucocorticoid regulated kinase (SGK), mRNA.                                                                               |
| ILMN_2049727 | 51526  | C20orf111 | Homo sapiens chromosome 20 open reading frame 111 (C20orf111), mRNA.                                                                          |
| ILMN_1701131 | 79074  | C2orf49   | Homo sapiens chromosome 2 open reading frame 49 (C2orf49), mRNA.                                                                              |
| ILMN_1769245 | 11010  | GLIPR1    | Homo sapiens GLI pathogenesis-related 1 (GLIPR1), mRNA.                                                                                       |
| ILMN_1711005 | 993    | CDC25A    | Homo sapiens cell division cycle 25 homolog A ( <i>S. pombe</i> ) (CDC25A), transcript variant 1, mRNA.                                       |
| ILMN_1676984 | 1649   | DDIT3     | Homo sapiens DNA-damage-inducible transcript 3 (DDIT3), mRNA.                                                                                 |
| ILMN_1725612 | 10762  | NUP50     | Homo sapiens nucleoporin 50kDa (NUP50), transcript variant 2, mRNA.                                                                           |
| ILMN_2317658 | 6520   | SLC3A2    | Homo sapiens solute carrier family 3 (activators of dibasic and neutral amino acid transport), member 2 (SLC3A2), transcript variant 1, mRNA. |
| ILMN_1794017 | 29950  | SERTAD1   | Homo sapiens SERTA domain containing 1 (SERTAD1), mRNA.                                                                                       |
| ILMN_1667825 | 197259 | MLKL      | Homo sapiens mixed lineage kinase domain-like (MLKL), mRNA.                                                                                   |
| ILMN_2221564 | 55646  | LYAR      | Homo sapiens Ly1 antibody reactive homolog (mouse) (LYAR), mRNA.                                                                              |
| ILMN_1781721 | 64794  | DDX31     | Homo sapiens DEAD (Asp-Glu-Ala-Asp) box polypeptide 31 (DDX31), transcript variant 1, mRNA.                                                   |

|              |        |           |                                                                                                                                                                                      |
|--------------|--------|-----------|--------------------------------------------------------------------------------------------------------------------------------------------------------------------------------------|
| ILMN_1657893 | 10587  | TXNRD2    | Homo sapiens thioredoxin reductase 2 (TXNRD2), nuclear gene encoding mitochondrial protein, mRNA.                                                                                    |
| ILMN_1726456 | 6520   | SLC3A2    | Homo sapiens solute carrier family 3 (activators of dibasic and neutral amino acid transport), member 2 (SLC3A2), transcript variant 6, mRNA.                                        |
| ILMN_1774589 | 55721  | IQCC      | Homo sapiens IQ motif containing C (IQCC), mRNA.                                                                                                                                     |
| ILMN_1748591 | 4953   | ODC1      | Homo sapiens ornithine decarboxylase 1 (ODC1), mRNA.                                                                                                                                 |
| ILMN_1731720 | 81572  | PDRG1     | Homo sapiens p53 and DNA-damage regulated 1 (PDRG1), mRNA.                                                                                                                           |
| ILMN_1666553 | 60386  | SLC25A19  | Homo sapiens solute carrier family 25 (mitochondrial thiamine pyrophosphate carrier), member 19 (SLC25A19), nuclear gene encoding mitochondrial protein, transcript variant 1, mRNA. |
| ILMN_1733703 | 55687  | TRMU      | Homo sapiens tRNA 5-methylaminomethyl-2-thiouridylate methyltransferase (TRMU), nuclear gene encoding mitochondrial protein, transcript variant 1, mRNA.                             |
| ILMN_1783276 | 91624  | NEXN      | Homo sapiens nexilin (F actin binding protein) (NEXN), mRNA.                                                                                                                         |
| ILMN_1729179 | 79029  | SPATA5L1  | Homo sapiens spermatogenesis associated 5-like 1 (SPATA5L1), mRNA.                                                                                                                   |
| ILMN_1667162 | 4824   | NKX3-1    | Homo sapiens NK3 homeobox 1 (NKX3-1), mRNA.                                                                                                                                          |
| ILMN_2117716 | 8227   | SFRS17A   | Homo sapiens splicing factor, arginine/serine-rich 17A (SFRS17A), transcript variant 1, mRNA.                                                                                        |
| ILMN_1770228 | 3885   | KRT34     | Homo sapiens keratin 34 (KRT34), mRNA.                                                                                                                                               |
| ILMN_1674983 | 387841 | LOC387841 | PREDICTED: Homo sapiens similar to ribosomal protein L13a, transcript variant 2 (LOC387841), mRNA.                                                                                   |
| ILMN_1670752 | 22889  | KIAA0907  | Homo sapiens KIAA0907 (KIAA0907), mRNA.                                                                                                                                              |
| ILMN_1785852 | 64859  | OBFC2A    | Homo sapiens oligonucleotide/oligosaccharide-binding fold containing 2A (OBFC2A), mRNA.                                                                                              |
| ILMN_2225577 | 134359 | C5orf37   | Homo sapiens chromosome 5 open reading frame 37 (C5orf37), mRNA.                                                                                                                     |
| ILMN_1791728 | 114789 | SLC25A25  | Homo sapiens solute carrier family 25 (mitochondrial carrier; phosphate carrier), member 25 (SLC25A25), nuclear gene encoding mitochondrial protein, transcript variant 1, mRNA.     |
| ILMN_1807136 | 729559 | LOC729559 | PREDICTED: Homo sapiens similar to ciliary rootlet coiled-coil, rootletin (LOC729559), mRNA.                                                                                         |
| ILMN_1787511 | 80745  | THUMP2    | Homo sapiens THUMP domain containing 2 (THUMP2), mRNA.                                                                                                                               |
| ILMN_1659936 | 23645  | PPP1R15A  | Homo sapiens protein phosphatase 1, regulatory (inhibitor) subunit 15A (PPP1R15A), mRNA.                                                                                             |
| ILMN_1682775 | 1906   | EDN1      | Homo sapiens endothelin 1 (EDN1), mRNA.                                                                                                                                              |
| ILMN_1693242 | 162979 | ZNF296    | Homo sapiens zinc finger protein 296 (ZNF296), mRNA.                                                                                                                                 |
| ILMN_1898124 |        |           | Homo sapiens cDNA FLJ38860 fis, clone MESAN2011977                                                                                                                                   |
| ILMN_3248773 | 285958 | C7orf40   | Homo sapiens chromosome 7 open reading frame 40 (C7orf40), non-coding RNA.                                                                                                           |
