# Supplementary material for: HIC1 controls cellular- and HIV-1- gene transcription via interactions with CTIP2 and HMGA1
Source: PubMed Central journal article supplement (PMC5057145; doi:10.1038/srep34920), 2016-10-11
Supplement: srep34920-s2.pdf [file srep34920-s2.pdf]

## Table 2: Gene lists of cellular targets regulated by HIC1 and HMGA1

### HIC1 controls cellular- and HIV-1- gene transcription via interactions with CTIP2 and HMGA1

Valentin Le Douce<sup>1,2,4</sup>, Faezeh Forouzanfar<sup>1</sup>, Sebastian Eilebrecht<sup>8,9</sup>, Benoit Van Driessche<sup>7</sup>, Amina Ait-Ammar<sup>1</sup>, Roxane Verdikt<sup>7</sup>, Yoshihito Kurashige<sup>5</sup>, Céline Marban<sup>5</sup>, Ermanno Candolfi<sup>1</sup>, Virginie Gautier<sup>4</sup>, Arndt G. Benecke<sup>6,9</sup>, Carine Van Lint<sup>7#</sup>, Olivier Rohr<sup>1,2,3#</sup> and Christian Schwartz<sup>1,2#</sup>

| PROBE        | Entrez_Gene_ID | Symbol    | Definition                                                                                                                |
|--------------|----------------|-----------|---------------------------------------------------------------------------------------------------------------------------|
| ILMN_1653115 | 1891           | ECH1      | Homo sapiens enoyl Coenzyme A hydratase 1, peroxisomal (ECH1), mRNA.                                                      |
| ILMN_1784602 | 1026           | CDKN1A    | Homo sapiens cyclin-dependent kinase inhibitor 1A (p21, Cip1) (CDKN1A), transcript variant 1, mRNA.                       |
| ILMN_2083946 | 7039           | TGFA      | Homo sapiens transforming growth factor, alpha (TGFA), mRNA.                                                              |
| ILMN_1684183 | 5883           | RAD9A     | Homo sapiens RAD9 homolog A (S. pombe) (RAD9A), mRNA.                                                                     |
| ILMN_1787509 | 85441          | PRIC285   | Homo sapiens peroxisomal proliferator-activated receptor A interacting complex 285 (PRIC285), transcript variant 2, mRNA. |
| ILMN_1745282 | 5891           | RAGE      | Homo sapiens renal tumor antigen (RAGE), mRNA.                                                                            |
| ILMN_1682015 | 51083          | GAL       | Homo sapiens galanin prepropeptide (GAL), mRNA.                                                                           |
| ILMN_1791679 | 92737          | DNER      | Homo sapiens delta/notch-like EGF repeat containing (DNER), mRNA.                                                         |
| ILMN_1725387 | 114801         | TMEM200A  | Homo sapiens transmembrane protein 200A (TMEM200A), mRNA.                                                                 |
| ILMN_2357134 | 8877           | SPHK1     | Homo sapiens sphingosine kinase 1 (SPHK1), transcript variant 1, mRNA.                                                    |
| ILMN_2090802 | 84283          | TMEM79    | Homo sapiens transmembrane protein 79 (TMEM79), mRNA.                                                                     |
| ILMN_1809364 | 4908           | NTF3      | Homo sapiens neurotrophin 3 (NTF3), mRNA.                                                                                 |
| ILMN_1712347 | 644422         | LOC644422 | PREDICTED: Homo sapiens misc_RNA (LOC644422), miscRNA.                                                                    |
| ILMN_1784948 | 90853          | SPOCD1    | Homo sapiens SPOC domain containing 1 (SPOCD1), mRNA.                                                                     |
| ILMN_1768754 | 29990          | PILRB     | Homo sapiens paired immunoglobulin-like type 2 receptor beta (PILRB), transcript variant 1, mRNA.                         |
| ILMN_1688480 | 595            | CCND1     | Homo sapiens cyclin D1 (CCND1), mRNA.                                                                                     |
| ILMN_1770338 | 4071           | TM4SF1    | Homo sapiens transmembrane 4 L six family member 1 (TM4SF1), mRNA.                                                        |
| ILMN_1794017 | 29950          | SERTAD1   | Homo sapiens SERTA domain containing 1 (SERTAD1), mRNA.                                                                   |
| ILMN_1770228 | 3885           | KRT34     | Homo sapiens keratin 34 (KRT34), mRNA.                                                                                    |
| ILMN_1682775 | 1906           | EDN1      | Homo sapiens endothelin 1 (EDN1), mRNA.                                                                                   |
